# Supplementary material for: High microvessel and lymphatic vessel density predict poor prognosis in patients with esophageal squamous cell carcinoma
Source: PeerJ. 2024 Sep 27;12:e18080. doi: 10.7717/peerj.18080 (PMC11441385; doi:10.7717/peerj.18080)
Supplement: Supplemental Information 1 [file peerj-12-18080-s001.xlsx]

## Sheet: Sheet1
Namber	Tumor/Normal	Sex	Age	Degree of tumor differentiation	Depth	lymph node metastasis	clinical staging	LVD	LVD classification	MVD	MVD classification	LVD+MVD status	Age stratification	Depth stratification	survival time	survival status
Remarks	1=cancer,2=Normal tissue adjacent to cancer	1=male,2=female		1=highly differentiated, 2=moderately differentiated, 3=poorly differentiated	1=T1, 2=T2, 3=T3, 4=T4	1=no, 2=yes	1=I-II, 2=III-IV	Lymphatic vessel density per high-power field	1=Low density, 2=High density	MVD per high-power field	1=Low density, 2=High density	1=both high LVD+MVD, 2=both low LVD+MVD, 3=non synergistic of MVD and LVD	1≤58,2>58	1=T1+T2,2=T2+T3		1=survival or lost, 2=dead
521	1	1	58	2	2	1	1	5	1	26	2	3	1	1	2	2
522	1	1	57	2	3	2	2	8	2	19	2	2	1	2	10	2
528	1	1	65	1	2	1	1	8	2	27	2	2	2	1	50	2
529	1	1	48	1	3	2	2	6	1	12	1	1	1	2	40	1
535	1	1	51	3	3	1	1	4	1	28	2	3	1	2	78	1
537	1	2	50	2	2	2	1	5	1	20	2	3	1	1	21	2
538	1	1	66	2	3	2	2	9	2	10	1	3	2	2	32	2
540	1	2	57	1	2	1	1	4	1	3	1	1	1	1	60	1
541	1	1	54	2	3	1	1	4	1	27	2	3	1	2	42	2
542	1	1	51	2	3	1	1	6	1	8	1	1	1	2	46	2
543	1	1	58	2	2	1	1	4	1	12	1	1	1	1		1
545	1	2	67	1	3	1	1	8	2	21	2	2	2	2		1
546	1	1	61	1	3	1	1	4	1	18	2	3	2	2	66	2
547	1	2	52	2	2	1	1	5	1	14	1	1	1	1		1
548	1	2	74	3	3	1	1	4	1	14	1	1	2	2	20	2
549	1	1	50	1	2	1	1	12	2	23	2	2	1	1	8	2
550	1	1	54	1	3	2	2	10	2	25	2	2	1	2	3	2
551	1	2	65	2	2	2	2	10	2	12	1	3	2	1	43	2
552	1	1	57	1	3	2	2	10	2	32	2	2	1	1	39	2
553	1	1	68	1	2	1	1	6	1	18	2	3	1	1	9	2
554	1	1	69	2	3	1	1	4	1	12	1	1	2	2	48	1
555	1	1	76	2	3	2	2	8	2	19	2	2	2	2	12	1
556	1	2	54	2	2	1	1	4	1	11	1	1	1	1	65	1
557	1	1	62	2	2	1	1	4	1	8	1	1	2	2	44	2
558	1	1	75	1	2	2	1	6	1	23	2	3	2	1	18	2
559	1	1	56	2	2	2	1	4	1	15	1	1	1	1	58	2
560	1	1	57	2	2	1	1	8	2	13	1	3	1	1		1
562	1	1	57	3	3	2	1	2	1	20	2	3	1	2	65	1
563	1	1	66	2	2	2	1	10	2	24	2	2	2	1	40	1
564	1	1	52	3	3	1	1	7	2	12	1	3	1	2	30	2
565	1	1	70	2	2	1	1	4	1	15	1	1	2	1	65	1
566	1	2	52	1	2	2	1	4	1	6	1	1	1	1	55	1
567	1	1	54	3	3	1	1	3	1	30	2	3	1	2	18	2
568	1	1	62	1	3	2	2	10	2	33	2	2	2	2	11	2
569	1	2	62	2	2	1	1	4	1	21	2	3	2	1	44	2
570	1	1	69	2	3	1	1	6	1	11	1	1	2	2	60	1
666	1	1	48	2	2	2	1	4	1	14	1	1	1	1	42	1
667	1	2	60	2	2	2	1	4	1	10	1	1	2	1	36	1
571	1	2	70	1	3	2	2	10	2	21	2	2	2	2	45	2
572	1	1	60	2	2	2	1	14	2	18	2	2	2	1	30	1
574	1	2	33	2	3	1	1	8	2	26	2	2	1	2	34	1
575	1	2	49	1	3	1	1	4	1	5	1	1	1	2	24	2
576	1	1	65	3	3	2	2	14	2	20	2	2	2	2	34	1
577	1	2	62	1	2	1	1	4	1	7	1	1	2	1	48	1
579	1	1	57	1	3	2	2	10	2	25	2	2	1	2	12	1
580	1	2	58	2	2	1	1	9	2	13	1	3	1	1	52	2
583	1	1	57	2	3	2	2	5	1	10	1	1	1	2	37	2
584	1	1	48	2	3	2	2	10	2	22	2	2	1	2	12	1
585	1	1	68	1	3	2	2	10	2	21	2	2	2	2	10	1
587	1	1	66	3	2	2	1	12	2	10	1	3	2	1	39	2
588	1	2	63	2	2	2	1	8	2	18	2	2	2	1	24	2
590	1	2	66	3	2	1	1	4	1	14	1	1	2	1	56	2
591	1	1	57	2	2	2	1	8	2	20	2	2	1	1	30	1
592	1	1	57	2	2	1	1	5	1	10	1	1	1	1	50	1
594	1	1	59	2	3	1	1	4	1	15	1	1	2	2	46	2
596	1	2	62	2	2	1	1	4	1	10	1	1	2	1	49	2
597	1	1	34	1	3	2	2	4	1	14	1	1	1	2	26	2
598	1	1	54	3	3	1	1	8	2	18	2	2	1	2	44	2
600	1	1	70	2	3	1	1	4	1	20	2	3	2	2	20	2
601	1	1	58	3	3	2	2	5	1	18	2	3	1	2	6	2
602	1	1	62	1	3	2	2	5	1	17	2	3	2	2	24	2
603	1	2	60	3	3	1	1	10	2	18	2	1	2	2		1
604	1	1	48	1	3	2	2	4	1	25	2	3	1	2	20	2
605	1	1	55	1	3	2	2	4	1	8	1	1	1	2		1
606	1	1	62	1	3	1	1	4	1	10	1	1	2	2		1
607	1	1	52	2	3	2	2	4	1	10	1	1	1	2	32	2
608	1	1	60	1	1	1	1	6	1	5	1	1	2	1	34	1
610	1	2	63	3	2	2	2	10	2	30	2	2	2	1	18	2
611	1	2	59	2	3	2	1	4	1	18	2	3	2	2	26	1
612	1	1	47	3	2	2	1	4	1	12	1	1	1	1	56	2
613	1	2	63	1	1	1	1	3	1	10	1	1	2	1	48	1
614	1	1	62	2	3	2	2	4	1	13	1	1	2	2	14	2
616	1	2	49	3	3	2	2	8	2	29	2	2	1	2	15	2
617	1	2	56	2	3	2	2	4	1	14	1	1	1	2	15	2
618	1	2	63	3	3	2	2	4	1	20	2	3	2	2		1
619	1	2	56	2	3	1	1	4	1	5	1	1	1	2	16	1
620	1	1	65	2	2	1	1	14	2	30	2	2	2	1		1
622	1	1	49	1	3	1	1	9	2	26	2	2	1	2		1
623	1	2	50	2	3	1	1	4	1	4	1	1	1	2	15	2
624	1	2	64	2	3	2	2	4	1	15	1	1	2	2		1
625	1	1	61	1	3	2	2	4	1	12	1	1	2	2	16	2
627	1	1	50	3	3	2	2	10	2	30	2	2	1	2	1	2
641	1	1	44	1	3	2	2	6	1	17	2	3	1	2		2
643	1	2	58	2	3	2	2	4	1	10	1	1	1	2	10	2
644	1	1	58	3	3	1	1	5	1	10	1	1	1	2	32	1
646	1	2	65	1	3	2	2	5	1	20	2	3	2	2	1	2
651	1	1	59	2	3	2	2	10	2	30	2	2	2	2	13	1
652	1	1	57	2	2	1	1	8	2	10	1	3	1	1	16	1
653	1	1	63	2	1	1	1	8	2	10	1	3	2	1	78	2
654	1	2	62	3	2	1	1	4	1	19	2	3	2	1	20	2
655	1	1	65	2	3	1	1	4	1	15	1	1	2	2	25	2
656	1	1	56	3	3	1	1	4	1	4	1	1	1	2		1
657	1	2	57	1	3	1	1	5	1	16	1	1	1	2		1
658	1	1	58	1	2	1	1	4	1	17	2	3	1	1	25	1
660	1	1	55	2	3	1	1	4	1	7	1	1	1	2		1
661	1	1	69	3	3	1	1	5	1	18	2	3	2	2	50	1
662	1	1	58	1	3	1	1	4	1	3	1	1	1	2	26	1
664	1	2	60	1	2	1	1	4	1	15	1	1	2	1	26	1
665	1	1	50	2	3	2	2	5	1	23	2	3	1	2	18	1
667	1	2	60	2	2	2	1	4	1	10	1	1	2	1	16	1
501	2	2	53					1		10
505	2	1	55					2		5
506	2	2	66					4		19
508	2	2	70					2		6
509	2	2	49					2		3
512	2	2	56					3		8
513	2	2	65					3		13
516	2	2	65					3		4
517	2	2	56					2		3
518	2	2	57					3		6
519	2	1	68					1		6
520	2	1	68					2		8
521	2	2	58					3		7
522	2	1	57					1		2
524	2	1	73					2		10
532	2	2	49					2		12
533	2	1	62					2		2
535	2	1	51					4		6
536	2	1	66					1		10
541	2	1	54					3		8
542	2	1	51					4		5
546	2	1	61					3		9
548	2	2	74					5		6
549	2	1	50					6		8
550	2	1	54					2		6
551	2	2	65					3		7
566	2	2	52					3		6
552	2	1	57					3		5
553	2	1	68					5		14
556	2	2	54					5		10
557	2	1						2		15
559	2	1	56					3		3
560	2	1	57					4		6
571	2	2	70					2		5
573	2	1	66					7		6
574	2	2	33					3		6
575	2	2	49					4		6
577	2	2	62					3		8
578	2	1	56					3		6
579	2	1	57					2		10
580	2	2	58					2		9
581	2	1	52					3		7
582	2	1	50					2		11
583	2	1	57					4		10
584	2	1	48					2		10
585	2	1	68					2		9
586	2	2	47					2		7
588	2	2	63					2		3
589	2	2	62					1		14
590	2	2	66					2		7
591	2	1	57					3		13
592	2	1	57					3		15
595	2	1	62					1		12
597	2	1	34					3		9
598	2	1	54					3		7
599	2	1	57					2		8
601	2	1	58					4		7
602	2	1	62					4		5
603	2	2	60					1		2
604	2	1	48					2		5
596	2	2	62					1		8
605	2	1	55					2		9
607	2	1	52					3		13
608	2	1	60					3		8
610	2	2	63					2		9
612	2	1	47					2		7
613	2	2	63					2		10
614	2	1	62					2		7
616	2	2	49					2		5
617	2	2	56					2		12
618	2	2	63					1		13
620	2	1	65					2		9
621	2	1	54					1		15
623	2	2	50					2		5
624	2	2	64					1		7
625	2	1	61					1		12
627	2	1	50					1		19
628	2	1	55					2		4
641	2	1	44					3		8
642	2	1	61					2		10
643	2	2	58					2		2
644	2	1	58					1		7
645	2	1	55					2		9
646	2	2	65					1		8
647	2	1	44					2		9
648	2	1	66					1		7
649	2	1	53					2		10
650	2	1	67					3		11
651	2	1	59					2		8
652	2	1	57					2		7
653	2	1	63					2		5
654	2	2	62					2		8
659	2	1	58					2		12
661	2	1	69					6		12
662	2	1	58					2		8
664	2	2	60					1		7
665	2	1	50					4		10
666	2	1	48					3		10
667	2	2	60					3		10
656	2	1	56					1		3
